# Supplementary figures and images for: Systematic Review of Lung Cancer Screening: Advancements and Strategies for Implementation
Source: MDPI journal article supplement (doi:10.3390/healthcare11142085), 2023-07-21

# Supplementary material

## Number of included studies with timeline

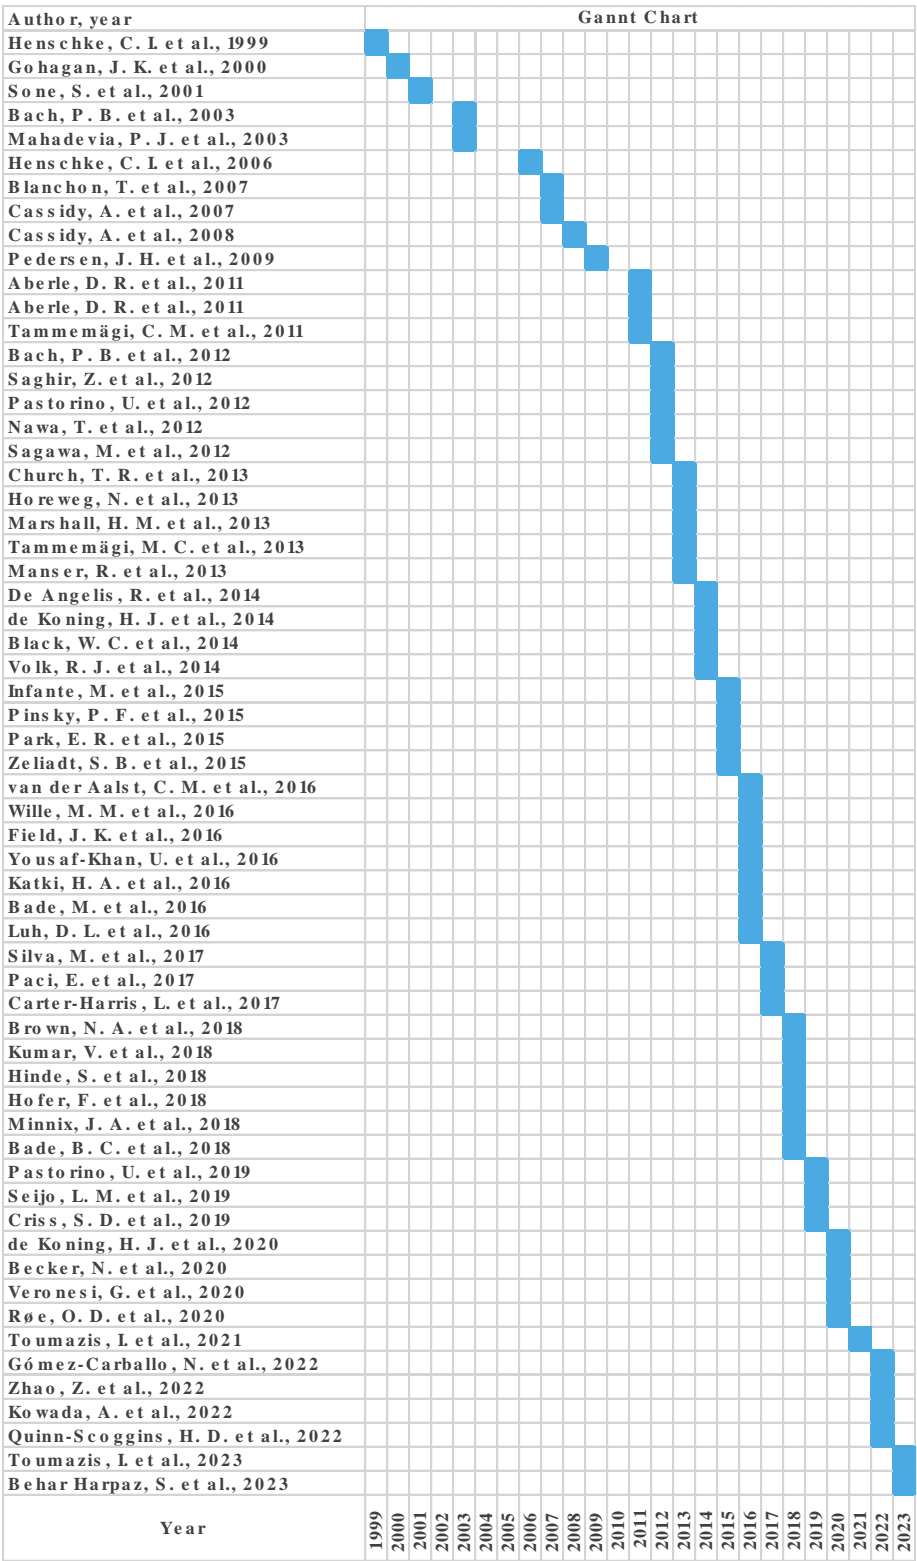

Supplement: s1 [file s1]
